# Supplementary material
Source: publisher figshare collection journal article supplement (https://frontiersin.figshare.com/ndownloader/files/22312050)
Supplement: Supplementary file [file 22312050]

**Supplementary Table S1.** Information on the broiler breeder flocks.

| Flock ID | Farm ID | Chicken breed | Age at sampling time Day 0 | Age at sampling time 4 weeks | Number of birds / flock |
|----------|---------|---------------|----------------------------|------------------------------|-------------------------|
| Flock 1  | Farm A  | Ross          | 36-week-old                | 40-week-old                  | NA                      |
| Flock 2  |         |               | 45-week-old                | 49-week-old                  | NA                      |
| Flock 3  | Farm B  | Cobb 500      | 40-week-old                | 44-week-old                  | 14,134                  |
| Flock 4  | Farm C  |               |                            |                              | 13,933                  |
| Flock 9  | Farm D  |               |                            |                              | 19,800                  |
| Flock 10 |         |               |                            |                              | 18,629                  |
| Flock 5  | Farm B  |               | 28-week-old                | 32-week-old                  | 11,916                  |
| Flock 7  | Farm C  |               |                            |                              | 11,673                  |
| Flock 8  |         |               |                            |                              | 6,893                   |
| Flock 6  | Farm B  |               |                            |                              | 5,575                   |
| Flock 11 | Farm E  |               |                            |                              | 8,098                   |
| Flock 12 |         |               |                            |                              | 11,200                  |
